# Supplementary material for: Development of CORE-CM core outcome domain sets for trials of Chinese medicine for lumbar spinal stenosis
Source: HighWire-hosted journal article supplement (doi:10.1136/bmjopen-2023-075856), 2023-10-01
Supplement: bmjopen-2023-075856supp001_data_supplement.pdf [file bmjopen-2023-075856supp001_data_supplement.pdf]

## Supplementary Material

Table S1. The COS-STAR Statement

| SECTION/TOPIC             | ITEM No. | CHECKLIST ITEM                                                                                                                                                                                                   | page no. |
|---------------------------|----------|------------------------------------------------------------------------------------------------------------------------------------------------------------------------------------------------------------------|----------|
| TITLE/ABSTRACT            |          |                                                                                                                                                                                                                  |          |
| Title                     | 1a       | Identify in the title that the paper reports the development of a COS                                                                                                                                            | 1        |
| Abstract                  | 1b       | Provide a structured summary                                                                                                                                                                                     | 3,4      |
| INTRODUCTION              |          |                                                                                                                                                                                                                  |          |
| Background and Objectives | 2a       | Describe the background and explain the rationale for developing the COS                                                                                                                                         | 6,7      |
|                           | 2b       | Describe the specific objectives with reference to developing a COS                                                                                                                                              | 6,7      |
| Scope                     | 3a       | Describe the health condition(s) and population(s) covered by the COS.                                                                                                                                           | 6-8      |
|                           | 3b       | Describe the intervention(s) covered by the COS.                                                                                                                                                                 | 6-8      |
|                           | 3c       | Describe the setting(s) in which the COS is to be applied.                                                                                                                                                       | 6-8      |
| METHODS                   |          |                                                                                                                                                                                                                  |          |
| Protocol/Registry Entry   | 4        | Indicate where the COS development protocol can be accessed, if available, and/or the study registration details.                                                                                                | 7,8      |
| Participants              | 5        | Describe the rationale for stakeholder groups involved in the COS development process, eligibility criteria for participants from each group, and a description of how the individuals involved were identified. | 7,8      |
| Information Sources       | 6a       | Describe the information sources used to identify an initial list of outcomes.                                                                                                                                   | 8-11     |
|                           | 6b       | Describe how outcomes were dropped/combined, with reasons (if applicable).                                                                                                                                       | 8-11     |
| Consensus Process         | 7        | Describe how the consensus process was undertaken.                                                                                                                                                               | 11-13    |

|                                      |     |                                                                                                                                   |                                   |
|--------------------------------------|-----|-----------------------------------------------------------------------------------------------------------------------------------|-----------------------------------|
| Outcome Scoring Consensus Definition | 8   | Describe how outcomes were scored and how scores were summarized.                                                                 | 11-13                             |
|                                      | 9a  | Describe the consensus definition.                                                                                                | 12,13                             |
|                                      | 9b  | Describe the procedure for determining how outcomes were included or excluded from consideration during the consensus process.    | 12,13                             |
| Ethics and Consent                   | 10  | Provide a statement regarding the ethics and consent issues for the study.                                                        | 8                                 |
| <b>RESULTS</b>                       |     |                                                                                                                                   |                                   |
| Protocol Deviations                  | 11  | Describe any changes from the protocol (if applicable), with reasons, and describe what impact these changes have on the results. | 8                                 |
| Participants                         | 12  | Present data on the number and relevant characteristics of the people involved at all stages of COS development.                  | 15-18 and Supplementary materials |
| Outcomes                             | 13a | List all outcomes considered at the start of the consensus process.                                                               | 15-18 Table 1-3                   |
|                                      | 13b | Describe any new outcomes introduced and any outcomes dropped, with reasons, during the consensus process.                        | 15-17                             |
| COS                                  | 14  | List the outcomes in the final COS.                                                                                               | 18-20, Table 4, figure 1          |
| <b>DISCUSSION</b>                    |     |                                                                                                                                   |                                   |
| Limitations                          | 15  | Discuss any limitations in the COS development process.                                                                           | 21-22                             |
| Conclusions                          | 16  | Provide an interpretation of the final COS in the context of other evidence, and implications for future research.                | 21-24                             |
| <b>OTHER INFORMATION</b>             |     |                                                                                                                                   |                                   |
| Funding                              | 17  | Describe sources of funding/role of funders.                                                                                      | 25                                |
| Conflicts of Interest                | 18  | Describe any conflicts of interest within the study team and how these were managed.                                              | 25                                |

Table S2. The COS-STAD checklist

| Domain                | Standard number | Methodology                                                                                 | page no.        |
|-----------------------|-----------------|---------------------------------------------------------------------------------------------|-----------------|
| Scope specification   | 1               | The research or practice setting(s) in which the COS is to be applied                       | 7,8             |
|                       | 2               | The health condition(s) covered by the COS                                                  | 7,8             |
|                       | 3               | The population(s) covered by the COS                                                        | 7,8             |
|                       | 4               | The intervention(s) covered by the COS                                                      | 7,8             |
| Stakeholders involved | 5               | Those who will use the COS in research                                                      | 7,11,12         |
|                       | 6               | Healthcare professionals with experience of patients with the condition                     | 11,12           |
|                       | 7               | Patients with the condition or their representatives                                        | 11,12           |
| Consensus process     | 8               | The initial list of outcomes considered both healthcare professionals' and patients' views. | 13-17, table1-3 |
|                       | 9               | A scoring process and consensus definition were described a priori.                         | 7,8             |
|                       | 10              | Criteria for including/dropping/adding outcomes were described a priori.                    | 11-13           |
|                       | 11              | Care was taken to avoid ambiguity of language used in the list of outcomes.                 | 11-13           |

Table S3. Search strategies and results

| Databases        | Search strategies                                                                                                                                                                                                                                                                                                                                                                                                                                                                                                                                                                                                                                                                                                                                                                                                                                                                                                                                                                                                                            | Results to Jan 1st, 2022 |
|------------------|----------------------------------------------------------------------------------------------------------------------------------------------------------------------------------------------------------------------------------------------------------------------------------------------------------------------------------------------------------------------------------------------------------------------------------------------------------------------------------------------------------------------------------------------------------------------------------------------------------------------------------------------------------------------------------------------------------------------------------------------------------------------------------------------------------------------------------------------------------------------------------------------------------------------------------------------------------------------------------------------------------------------------------------------|--------------------------|
| PUBMED           | ("chin med"[Journal] OR ("chinese"[All Fields] AND "medicine"[All Fields]) OR "chinese medicine"[All Fields] OR "tuina"[All Fields] OR ("massage"[MeSH Terms] OR "massage"[All Fields] OR "massages"[All Fields] OR "massaged"[All Fields] OR "massager"[All Fields] OR "massagers"[All Fields] OR "massaging"[All Fields]) OR ("cupping"[All Fields] OR "cuppings"[All Fields]) OR ("moxibustion"[MeSH Terms] OR "moxibustion"[All Fields]) OR ("acupunctural"[All Fields] OR "acupuncture"[MeSH Terms] OR "acupuncture"[All Fields] OR "acupuncture therapy"[MeSH Terms] OR ("acupuncture"[All Fields] AND "therapy"[All Fields]) OR "acupuncture therapy"[All Fields] OR "acupuncture s"[All Fields] OR "acupunctured"[All Fields] OR "acupunctures"[All Fields] OR "acupuncturing"[All Fields]) OR ("trends cardiovasc med"[Journal] OR "case manager"[Journal] OR "tcm"[All Fields]) OR "taichi"[All Fields]) AND ("spinal stenosis"[MeSH Terms] OR ("spinal"[All Fields] AND "stenosis"[All Fields]) OR "spinal stenosis"[All Fields]) | 195                      |
| Embase           | ((('chinese'/exp OR chinese) AND ('medicine'/exp OR medicine) OR taichi) AND spinal AND ('stenosis'/exp OR stenosis) AND ([chinese]/lim OR [english]/lim) AND [humans]/lim AND [clinical study]/lim AND [embase]/lim AND [<1966-2021]/py                                                                                                                                                                                                                                                                                                                                                                                                                                                                                                                                                                                                                                                                                                                                                                                                     | 160                      |
| Cochrane Library | (chinese medicine or TCM or tuina or massage or acupuncture or cupping or Moxibustion or taichi):ti,ab,kw and (Spinal stenosis):ti,ab,kw                                                                                                                                                                                                                                                                                                                                                                                                                                                                                                                                                                                                                                                                                                                                                                                                                                                                                                     | 73                       |
| CNKI             | SU='中医'+ '中药'+ '中西医结合'+ '中医药'+ '针灸'+ '推拿'+ '手法'+ '针刺'+ '艾灸'+ '拔罐'+ '汤药'+ '针刀'+ '热敷'+ '功法'+ '导引'+ '放血'+ '刺络'+ '泡洗'+ '太极'+ '按摩'+ '正骨'+ '点穴'+ '穴位注射' AND SU='腰椎管狭窄'+ '腰椎管狭窄症'+ '椎管狭窄'+ '椎管狭窄症'+ '退行性腰椎管狭窄症'+ '间歇性跛行'                                                                                                                                                                                                                                                                                                                                                                                                                                                                                                                                                                                                                                                                                                                                                                                                                            | 988                      |
| Wanfang          | 主题:("中医" or "中医药" or "中西医结合" or "中药" or "针灸" or "针刺" or "艾灸" or "穴位注射" or "推拿" or "手法" or "按摩" or "正骨" or "拔罐" or "放血" or "刺络" or "泡洗" or "热敷" or "针刀" or "导引" or "功法" or "太极" or "点穴" or "汤药") and 主题:("腰椎管狭窄" or "腰椎管狭窄症" or "                                                                                                                                                                                                                                                                                                                                                                                                                                                                                                                                                                                                                                                                                                                                                                                                             | 1784                     |

|          |                                                                                                                                                                                                                                                                                                                                                                                                            |      |
|----------|------------------------------------------------------------------------------------------------------------------------------------------------------------------------------------------------------------------------------------------------------------------------------------------------------------------------------------------------------------------------------------------------------------|------|
|          | 椎管狭窄" or "椎管狭窄症" or "退行性腰椎管狭窄症")                                                                                                                                                                                                                                                                                                                                                                           |      |
| Sinomend | ((("电针"[常用字段:智能] OR "针刺"[常用字段:智能] OR "正骨"[常用字段:智能] OR "拔罐"[常用字段:智能] OR "艾灸"[常用字段:智能] OR "放血"[常用字段:智能] OR "刺络"[常用字段:智能] OR "泻血"[常用字段:智能] OR "火罐"[常用字段:智能]) OR ("中医"[常用字段:智能] OR "中药"[常用字段:智能] OR "中医药"[常用字段:智能] OR "针灸"[常用字段:智能] OR "方剂"[常用字段:智能] OR "汤药"[常用字段:智能] OR "推拿"[常用字段:智能] OR "手法"[常用字段:智能] OR "拔罐"[常用字段:智能])) AND ("腰椎管狭窄症"[常用字段:智能] OR "椎管狭窄症"[常用字段:智能] OR "腰椎管狭窄"[常用字段:智能] OR "椎管狭窄"[常用字段:智能])) | 1084 |
| VIP      | M=(腰椎管狭窄) AND U=(针灸 OR 推拿 OR 艾灸 OR 针刺 OR 手法 OR 拔罐 OR 功法 OR 太极 OR 中医)                                                                                                                                                                                                                                                                                                                                       | 1480 |

Table S4. Patient features representing the target participants

| Category                    | Features                                      |
|-----------------------------|-----------------------------------------------|
| Age                         | 8 patients ≥65 years of age                   |
|                             | 8 patients <65 years of age                   |
| Sex                         | 8 females                                     |
|                             | 8 males                                       |
| Disease courses             | 8 patients ≥10 years                          |
|                             | 8 patients <10 years                          |
| Radiographic classification | Covering lateral recess, central spinal canal |
|                             | intervertebral foramen                        |
| territorial region          | At least more than 5 regions of China         |

Table S5. Studies’ Characteristics and Outcome Measurement Instruments

| First author, year    | Partici pants | Interventions             | Comparator                            | Outcome Measurement Instruments                                  | Treat ment durati on | OMI measuring time                                                                                      | Subdomain outcomes                                                                  | COMET outcomes                        | criter ia for respo nder rates |
|-----------------------|---------------|---------------------------|---------------------------------------|------------------------------------------------------------------|----------------------|---------------------------------------------------------------------------------------------------------|-------------------------------------------------------------------------------------|---------------------------------------|--------------------------------|
| Zeng Haobin, 2020[1]  | 60/60         | Manual therapy+Usual care | Celecoxib+Usual care                  | JOA<br>VAS<br>parameters of computed tomography                  | 2w                   | Pre- and post-treatment, follow-up 3m and 6m                                                            | pain/function/ ADL<br>pain<br>Radiographic changes                                  | pain function<br>Physiologi cal       | NR                             |
| Chen Jian, 2019[2]    | 30/30         | CM herb                   | Aceclofenac+Mecobal amin              | JOA<br>IL-6/CRP<br>ODI<br>AE<br>hepatic and renal function tests | 4w                   | Pre-treatment, 2 and 4w after treatment<br>Pre- and post-treatment for hepatic and renal function tests | pain/function/ ADL<br>Inflammatory markers<br>function<br>AE<br>Physiological index | pain function<br>Physiologi cal<br>AE | JOA                            |
| Feng Sui 2009[3]      | 40/40         | Acupotomy                 | Traction                              | Responder rates                                                  | 2m                   | Pre- and post-treatment                                                                                 | pain/function                                                                       | pain function                         | DEC - TCM                      |
| Geng Xiaoyan, 2017[4] | 46/46         | CM herb                   | Salvia (Danshen) injection+Diclofenac | JOA                                                              | NR                   | Pre- and post-treatment                                                                                 | pain/function/ ADL                                                                  | pain function                         | NR                             |

|                        |                 |                                                  |                                                                  |                                                    |    |                                                           |                                                                              |                        |                 |
|------------------------|-----------------|--------------------------------------------------|------------------------------------------------------------------|----------------------------------------------------|----|-----------------------------------------------------------|------------------------------------------------------------------------------|------------------------|-----------------|
| Gu Qi, 2015[5]         | 30/30           | CM herb                                          | Glucos                                                           | mJOA<br>VAS<br>SPWT<br>Responder rates             | 2w | Pre- and post-treatment, follow-up 1m for Responder rates | pain/function/<br>ADL<br>pain<br>measure of walking<br>pain/function/<br>ADL | pain<br>function       | JOA             |
| Guan Xiaoyong, 2015[6] | 47/47           | CM herb                                          | Salvia (Danshen) injection+Diclofenac                            | VAS<br>Responder rates                             | 1m | Pre- and post-treatment                                   | pain<br>pain                                                                 | pain                   | VAS             |
| Hou Yu, 2019[7]        | 22/23           | Manual therapy                                   | NSAIDs+Drugs for protecting gastric mucosa and nourishing nerves | JOA<br>VAS                                         | 4w | Pre- and post-treatment                                   | pain/function/<br>ADL<br>pain                                                | pain<br>function       | NR              |
| Huang Zheng, 2017[8]   | 31/33/<br>32/33 | CM herb<br>Acupuncture<br>CM<br>herb+Acupuncture | Diclofenac+Mecobala min                                          | JOA/improvement of<br>JOA<br>Responder rates<br>AE | 3m | Pre-treatment, 1, 2 and 3m after treatment                | pain/function/<br>ADL<br>pain/function/<br>AE                                | pain<br>function<br>AE | DEC<br>-<br>TCM |
| Huang Zhifen, 2009[9]  | 50/46           | CM herb                                          | Diclofenac                                                       | Responder rates<br>AE                              | 4w | Pre- and post-treatment                                   | pain/function/<br>AE                                                         | pain<br>function<br>AE | DEC<br>-<br>TCM |
| Ji Wei, 2013[10]       | 35/34           | CM herb                                          | Mecobalamin                                                      | Responder rates<br>VAS<br>mJOA                     | 4w | Pre- and post-treatment                                   | pain/function/<br>pain<br>pain/function/<br>ADL                              | pain<br>function       | DEC<br>-<br>TCM |



|                        |                 |                                                                            |                                                                                                  |                                                                                      |    |                                                                                                                     |                                                   |                                |           |
|------------------------|-----------------|----------------------------------------------------------------------------|--------------------------------------------------------------------------------------------------|--------------------------------------------------------------------------------------|----|---------------------------------------------------------------------------------------------------------------------|---------------------------------------------------|--------------------------------|-----------|
| Jia Yingchun, 2005[11] | 45/22           | CM herb+CM rehabilitation                                                  | Drugs (Diclofenac tablets or Diethylamine Emulgel, Chondroitin Sulfate Tablets, VB1, VB6, et al) | VAS<br>Self-made symptoms rating scale<br>UBA pain behavior scale<br>Responder rates | 2w | Pre- and post-treatment                                                                                             | pain symptoms<br>pain<br>pain/function/           | pain function                  | DEC - TCM |
| Li Jinxue, 2007[12]    | 40/40/<br>44/42 | CM herb<br>CM herb+CM granules<br>CM herb+CM granules+Erigeron breviscapus | GIucos                                                                                           | Responder rates<br>VAS<br>parameters of computed tomography                          | 4w | Pre- and post-treatment for Responder rates/VAS/Radiographic changes, follow-up 12month for Responder rates         | pain/function/ADL<br>pain<br>Radiographic changes | pain function<br>Physiological | JOA       |
| Li Jinxue, 2013[13]    | 92/83           | CM herb                                                                    | GIucos                                                                                           | Responder rates<br>VAS<br>Walking capacity                                           | 2w | Pre- and post-treatment for Responder rates/VAS/Walking capacity, follow-up 1m for Responder rates/Walking capacity | pain/function/<br>pain<br>measure of walking      | pain function                  | GPC R-ND  |

|                     |       |         |                   |                                              |    |                                               |                                                                                                                                                                                                          |                                                  |     |
|---------------------|-------|---------|-------------------|----------------------------------------------|----|-----------------------------------------------|----------------------------------------------------------------------------------------------------------------------------------------------------------------------------------------------------------|--------------------------------------------------|-----|
| Li Qiming, 2018[14] | 98/60 | CM herb | Usual care        | JOA<br>VAS                                   | 2w | Pre- and post-treatment                       | pain/function/<br>ADL<br>pain<br>pain/function/<br>ADL<br>pain<br>pain/function/<br>QOL: physical<br>function, role-                                                                                     | pain<br>function                                 | NR  |
| Li Rui, 2016[15]    | 43/43 | CM herb | Loxoprofen sodium | JOA<br>VAS<br>Responder rates<br>SF-36<br>AE | 2m | Pre- and post-treatment                       | physical,<br>bodily pain,<br>general health,<br>vitality, social<br>function, role-<br>emotional,<br>mental health<br>Psychosocial<br>AE<br>pain<br>pain/function/<br>ADL<br>pain/function/<br>ADL<br>AE | AE<br>mental<br>health<br>Psychosoc<br>ial<br>AE | NR  |
| Li Zhiwei, 2008[16] | 20/20 | CM herb | Diclofenac        | VAS<br>JOA<br>Responder rates<br>AE          | 4w | Pre-treatment, 1, 2, 3 and 4w after treatment |                                                                                                                                                                                                          | pain<br>function<br>AE                           | JOA |

|                        |       |                |                                             |                                                                  |     |                                         |                                                                              |                                          |                 |
|------------------------|-------|----------------|---------------------------------------------|------------------------------------------------------------------|-----|-----------------------------------------|------------------------------------------------------------------------------|------------------------------------------|-----------------|
| Lin Yuanfang, 2017[17] | 33/32 | Manual therapy | Traction                                    | Responder rates<br>JOA<br>Rang of Lumbar spine extension         | 20d | Pre- and post-treatment                 | pain/function/<br>pain/function/<br>ADL<br>ROM                               | pain<br>function<br>AE                   | DEC<br>-<br>TCM |
| Liu Chenhui, 2019[18]  | 30/30 | CM herb        | Celecoxib+Mecobala min+Hydrotalcite Tablets | VAS<br>SPWT<br>CM Zheng scores<br>Responder rates<br>AE          | 2w  | Pre- and post-treatment                 | pain<br>Measure of walking<br>CM Zheng<br>pain/function/<br>AE               | pain<br>function<br>AE<br>CM<br>indictor | DEC<br>-<br>TCM |
| Liu Haifan, 2010[19]   | 30/30 | Acupotomy      | Canal injection                             | Global Rating of Change Scale<br>Responder rates                 | 2w  | Pre- and post-treatment                 | Global rating of change<br>pain/function/                                    | pain<br>function                         | DEC<br>-<br>TCM |
| Liu Jun, 2020[20]      | 46/46 | CM herb        | Mannitol Injection+Mecobalami n             | Responder rates                                                  | 3w  | Pre- and post-treatment                 | pain/function/                                                               | pain<br>function                         | NR              |
| Sheng Xinjun, 2016[21] | 40/40 | Acupotomy      | Traction                                    | Responder rates<br>VAS<br>JOA<br>Changes in T lymphocyte subsets | 20d | Pre- and post-treatment                 | pain/function/<br>pain<br>pain/function/<br>ADL<br>Immunologica l indicators | pain<br>function<br>Physiologi cal       | DEC<br>-<br>TCM |
| Su Lianshu, 2015[22]   | 38/37 | Acupotomy      | Canal injection                             | VAS<br>JOA<br>Responder rates                                    | 3w  | Pre-treatment, 1 and 4w after treatment | pain<br>pain/function/<br>ADL<br>pain/function/                              | pain<br>function                         | DEC<br>-<br>TCM |

|                          |       |             |                                |                                                                              |    |                                                                            |                                                                            |                                              |                             |
|--------------------------|-------|-------------|--------------------------------|------------------------------------------------------------------------------|----|----------------------------------------------------------------------------|----------------------------------------------------------------------------|----------------------------------------------|-----------------------------|
| Sun Biyun, 2021[23]      | 40/40 | Acupuncture | Sham Acupuncture               | NRS<br>mRMDQ<br>HADS<br>Treatment Adherence index<br>AE                      | 6w | Pre-treatment, 6w after treatment, follow-up 12w and 24w for NRS/RMDQ/HADS | pain function<br>Psychological assessment<br>Adherence and attrition<br>AE | pain function<br>mental health<br>compliance | NR                          |
| Tang Hanwu, 2015[24]     | 35/34 | CM herb     | Celecoxib+Mecobalamin          | Responder rates<br>VAS<br>JOA<br>Near-infrared imaging system on DU meridian | 4w | Pre- and post-treatment                                                    | pain/function/<br>pain<br>pain/function/<br>ADL<br>CM meridian             | pain function<br>CM indicator                | DEC<br>-<br>TCM             |
| Wang Chenghong, 2009[25] | 46/44 | acupuncture | Traction+Physical therapy      | JOA<br>mRMDQ<br>responder rates                                              | 2w | Pre- and post-treatment, follow-up 6m                                      | pain/function/<br>ADL<br>function<br>pain/function/<br>ADL                 | pain function                                | JOA                         |
| Wang Guanjun, 2019[26]   | 53/53 | CM herb     | Mannitol Injection+Mecobalamin | VAS<br>JOA<br>Responder rates                                                | 3w | Pre- and post-treatment                                                    | pain<br>pain/function/<br>ADL<br>pain/function/                            | pain function                                | DEC<br>-<br>TCM<br>;<br>JOA |

|                        |       |                |                           |                                                  |     |                                              |                                                                                        |                                                          |                 |
|------------------------|-------|----------------|---------------------------|--------------------------------------------------|-----|----------------------------------------------|----------------------------------------------------------------------------------------|----------------------------------------------------------|-----------------|
| Wang Haijun, 2017[27]  | 47/47 | Acupotomy      | Traction+Physical therapy | VAS<br>JOA<br>Responder rates                    | 14d | Pre- and post-treatment, follow-up 1m and 6m | pain<br>pain/function/<br>ADL<br>pain/function/                                        | pain<br>function                                         | VAS<br>;<br>JOA |
| Wang Hua, 2017[28]     | 50/50 | Manual therapy | Epidural injection        | Responder rates                                  | 4w  | Pre- and post-treatment                      | pain/function/                                                                         | pain<br>function                                         | DEC<br>-<br>TCM |
| Wu Shizhen, 2016[29]   | 13/13 | Acupotomy      | Canal injection           | Global Rating of Change Scale<br>Responder rates | NR  | Pre- and post-treatment                      | Global rating of change<br>pain                                                        | pain<br>function                                         | NR              |
| Xiao Zhenhua, 2021[30] | 23/23 | Acupotomy      | Canal injection           | VAS<br>JOA                                       | 20d | Pre- and post-treatment                      | pain<br>pain/function/<br>ADL<br>pain/function/                                        | pain<br>function                                         | NR              |
| Zhou Qishi, 2002[31]   | 51/51 | CM herb        | Vitamin B1 B6             | Responder rates<br>SPWT<br>Serum endothelin      | 4w  | Pre- and post-treatment                      | Measure of walking<br>Physiological index<br>function<br>QOL: physical function, role- | function<br>Physiological                                | NR              |
| kim, 2016[32]          | 26/24 | Acupuncture    | Usual care                | ODI<br>SF-36                                     | 6w  | Pre- and post-treatment, follow-up 3m        | physical, bodily pain, general health, vitality, social function, role-                | pain<br>function<br>QOL<br>mental health<br>Psychosocial | NR              |

| Psychosocial                   |          |                           |                        |                                                     |    |                                                                                                           |                                                             |                                      |                 |
|--------------------------------|----------|---------------------------|------------------------|-----------------------------------------------------|----|-----------------------------------------------------------------------------------------------------------|-------------------------------------------------------------|--------------------------------------|-----------------|
| emotional, mental health       |          |                           |                        |                                                     |    |                                                                                                           |                                                             |                                      |                 |
| Pain                           |          |                           |                        |                                                     |    |                                                                                                           |                                                             |                                      |                 |
| function                       |          |                           |                        |                                                     |    |                                                                                                           |                                                             |                                      |                 |
| satisfaction                   |          |                           |                        |                                                     |    |                                                                                                           |                                                             |                                      |                 |
| Quality of life                |          |                           |                        |                                                     |    |                                                                                                           |                                                             |                                      |                 |
| Health-related quality of life |          |                           |                        |                                                     |    |                                                                                                           |                                                             |                                      |                 |
| Patient satisfaction           |          |                           |                        |                                                     |    |                                                                                                           |                                                             |                                      |                 |
| Adverse events                 |          |                           |                        |                                                     |    |                                                                                                           |                                                             |                                      |                 |
| Oka, 2018[33]                  | 41/38/40 | Acupuncture               | Drugs/Exercise therapy | ZCQ                                                 | 1m | Pre- and post-treatment                                                                                   | pain/function/satisfaction                                  | pain function satisfaction           | NR              |
| Qin, 2020[34]                  | 40/40    | Acupuncture               | Sham Acupuncture       | RMDQ<br>NRS<br>SSS<br>Satisfaction subdomain of SSS | 8w | Pre-treatment, 4 and 8w after treatment, follow-up 3m and 6m                                              | function pain pain/function/satisfaction                    | pain function satisfaction           | NR              |
| Xu Jialong, 2021[35]           | 29/29    | CM herb+Usual care        | Drugs+Usual care       | VAS<br>JOA<br>SPWT<br>CM Zheng scores<br>AE         | 4w | Pre-treatment, 2 and 4w after treatment for VAS, JOA<br>Pre- and post-treatment for SPWT, CM Zheng scores | pain pain/function/ADL<br>Measure of walking<br>CM Zheng AE | pain function<br>CM indicators<br>AE | DEC<br>-<br>TCM |
| Zhu Shuxian, 2014[36]          | 30/30    | Manual therapy+Usual care | Traction+Usual care    | Responder rates<br>VAS<br>ODI                       | 3w | Pre- and post-treatment                                                                                   | pain/function/pain function                                 | pain function                        | DEC<br>-<br>TCM |

|                        |       |                                        |                |                                                                    |     |                                                        |                                                                         |                                |                 |
|------------------------|-------|----------------------------------------|----------------|--------------------------------------------------------------------|-----|--------------------------------------------------------|-------------------------------------------------------------------------|--------------------------------|-----------------|
| Liu Li, 2020[37]       | 32/32 | Acupuncture+Moxibustion                | Acupuncture    | Responder rates<br>Self-made symptoms rating scale<br>JOA<br>VAS   | 20d | Pre- and post-treatment                                | pain/function/symptoms<br>pain/function/ADL<br>pain                     | pain function                  | DEC<br>-<br>TCM |
| Wang Chenghu, 2014[38] | 45/45 | Acupuncture+Moxibustion                | Ibuprofen      | Responder rates                                                    | 10d | Pre- and post-treatment                                | pain/function/                                                          | pain function                  | DEC<br>-<br>TCM |
| Su Tao, 2011[39]       | 60/60 | Acupuncture+Moxibustion+manual therapy | manual therapy | Responder rates                                                    | 12d | Pre- and post-treatment                                | pain/function/                                                          | pain function                  | DEC<br>-<br>TCM |
| Liao Jian, 2017[40]    | 30/30 | CM herb+Acupuncture                    | Acupuncture    | Responder rates<br>RMDQ                                            | 2w  | Pre- and post-treatment                                | pain/function/function                                                  | pain function                  | DEC<br>-<br>TCM |
| Shan Jinchun, 2013[41] | 48/48 | CM herb+manual therapy                 | manual therapy | Responder rates<br>CM Zheng scores                                 | 1m  | Pre- and post-treatment                                | pain/function/CM Zheng                                                  | pain function<br>CM indicators | COC<br>E        |
| Hu Kaixia, 2021[42]    | 20/20 | CM herb+CM fumigation                  | CM fumigation  | VAS<br>JOA<br>ODI<br>Pain-free walking distance<br>CM Zheng scores | 4w  | Pre-treatment, 2w and 4w after treatment, follow-up 1m | pain<br>pain/function/ADL<br>function<br>Measure of walking<br>CM Zheng | pain function<br>CM indicators | NR              |

|                         |       |                                      |                    |                                                                           |          |                                                                 |                                                                   |                              |                 |
|-------------------------|-------|--------------------------------------|--------------------|---------------------------------------------------------------------------|----------|-----------------------------------------------------------------|-------------------------------------------------------------------|------------------------------|-----------------|
| He Yuanzhen g, 2009[43] | 60/60 | CM herb+manual therapy               | manual therapy     | Responder rates                                                           | 1m       | Pre- and post-treatment                                         | pain/function/                                                    | pain function                | DEC - TCM       |
| Li Zhulie, 2012[44]     | 30/30 | Electrothermal acupuncture           | Acupuncture        | JOA Responder rates AE                                                    | 10 times | Pre-treatment, 1, 2, and 3 course after treatment, follow-up 1m | pain/function/ ADL pain/function/ ADL AE                          | pain function AE             | JOA             |
| Chen Xiaoyun, 2009[45]  | 30/30 | Electropuncture+Bloodletting therapy | Electropuncture    | Responder rates Global Rating of Change Scale VAS JOA IL-6\IL-4\IL-10\TNF | 20d      | Pre- and post-treatment                                         | pain/function/ symptoms pain pain/function/ ADL                   | pain function                | DEC - TCM       |
| Lei Xiaoping, 2020[46]  | 34/34 | CM herb+Acupuncture                  | GIucos+Mecobalamin | Blood viscosity/plasma viscosity/RBC hematocrit Responder rates AE        | 1m       | Pre- and post-treatment                                         | Inflammatory markers Hemorheological indicators pain/function/ AE | pain function AE Physiologic | DEC - TCM       |
| Cai Lijun, 2012[47]     | 32/64 | CM herb+kerotherapy                  | Drugs/Traction     | Responder rates JOA                                                       | 3w       | Pre- and post-treatment                                         | pain/function/ pain/function/ ADL                                 | pain function                | DEC - TCM ; JOA |



|                         |       |                                 |                                    |                                                    |     |                                              |                                                                       |                     |                     |
|-------------------------|-------|---------------------------------|------------------------------------|----------------------------------------------------|-----|----------------------------------------------|-----------------------------------------------------------------------|---------------------|---------------------|
| Yu Weimin, 2012[48]     | 32/28 | CM herb+Manual therapy          | Canal injection                    | Responder rates                                    | NR  | Pre- and post-treatment                      | pain/function/                                                        | pain function       | STI-ICWM            |
| Zhang Zhirong, 2017[49] | 31/31 | Acupuncture+Moxibustion         | Acupuncture                        | Responder rates                                    | 20d | Pre- and post-treatment                      | pain/function/ADL                                                     | pain function       | JOA                 |
| Wu Zhijun, 2018[50]     | 30/30 | CM herb+manual therapy          | manual therapy                     | Responder rates<br>AE                              | 4w  | Pre- and post-treatment                      | pain/function/AE                                                      | pain function<br>AE | NR                  |
| Tang Ning, 2016[51]     | 19/19 | CM herb+manual therapy          | manual therapy                     | JOA<br>VAS<br>Responder rates                      | 4w  | Pre- and post-treatment                      | pain/function/ADL<br>pain<br>pain/function/                           | pain function       | NR                  |
| Tian Qiang, 2015[52]    | 35/35 | CM herb+manual therapy          | CM herb                            | VAS<br>RMDQ<br>Responder rates                     | 4w  | Pre- and post-treatment, follow-up 6m        | pain function<br>pain/function/                                       | pain function       | DEC-TCM             |
| Ge Caihua, 2016[53]     | 30/30 | Topical CM+hot compress         | Diclofenac<br>Diethylamine Emulgel | JOA<br>VAS                                         | 4w  | Pre- and post-treatment                      | pain/function/ADL<br>pain<br>pain                                     | pain function       | JOA                 |
| Liang Yihao, 2016[54]   | 29/29 | manual therapy+Exercise therapy | Exercise therapy                   | VAS<br>JOA<br>SPWT<br>ODI<br>Responder rates<br>AE | 3m  | Pre-treatment, 1w, 1m and 3m after treatment | pain/function/ADL<br>measure of walking<br>function<br>pain/function/ | pain function<br>AE | VAS;<br>JOA\<br>ODI |

|                       |       |                         |                |                                                   |     |                         |                                                                                                                                                                                                   |                                                    |           |
|-----------------------|-------|-------------------------|----------------|---------------------------------------------------|-----|-------------------------|---------------------------------------------------------------------------------------------------------------------------------------------------------------------------------------------------|----------------------------------------------------|-----------|
| Liang Bojin, 2005[55] | 25/24 | CM herb+Manual therapy  | Manual therapy | VAS<br>SF-36<br>Pain-free walking distance<br>ODI | 2m  | Pre- and post-treatment | ADL<br>AE<br><br>pain<br>QOL: physical function, role-physical, bodily pain, general health, vitality, social function, role-emotional, mental health<br>Psychosocial Measure of walking function | pain function<br>QOL mental health<br>Psychosocial | DEC - TCM |
| Lin Tingyue, 2010[56] | 48/45 | Acupuncture+Moxibustion | Acupuncture    | Responder rates                                   | 36d | Pre- and post-treatment | pain/function/                                                                                                                                                                                    | pain function                                      | DEC - TCM |

|                        |          |                                      |                                                               |  |                                                                                                                |     |                                                                      |                                                                                                                            |                                |         |
|------------------------|----------|--------------------------------------|---------------------------------------------------------------|--|----------------------------------------------------------------------------------------------------------------|-----|----------------------------------------------------------------------|----------------------------------------------------------------------------------------------------------------------------|--------------------------------|---------|
|                        |          |                                      |                                                               |  | SPWT<br>VAS<br>JOA<br>IL-6\IL-1B\TNF\CRP<br>Blood viscosity/plasma viscosity/RBC hematocrit<br>Responder rates |     |                                                                      | measure of walking<br>pain<br>pain/function/ADL<br>Inflammatory markers<br>Hemorheological indicators<br>pain/function/ADL |                                |         |
| Xu Shiliang, 2014[57]  | 47/48    | CM herb+manual therapy               | GIucos                                                        |  |                                                                                                                | 4w  | Pre- and post-treatment for all, and follow-up 4w for SPWT, VAS, JOA |                                                                                                                            | pain function<br>Physiological | JOA     |
| Lu Yaoyu, 2014[58]     | 40/40/40 | CM herb+Manual therapy               | CM herb+sham<br>Manual therapy<br>sham CM herb+Manual therapy |  | Responder rates<br>Self-made symptoms rating scale                                                             | 6w  | Pre- and post-treatment                                              | pain/function/symptoms                                                                                                     | pain function                  | GPCR-ND |
| Mao Xiaohui, 2008[59]  | 52/52    | CM herb+Manual therapy+CM fumigation | Drugs +Traction +TDP                                          |  | Global Rating of Change Scale<br>Responder rates<br>Responder rates<br>Self-made symptoms rating scale         | 10d | Pre- and post-treatment                                              | symptoms<br>pain/function/symptoms                                                                                         | pain function                  | DEC-TCM |
| Yuan Zhixian, 2020[60] | 30/30    | CM herb+Acupuncture+Moxibustion      | Usual care                                                    |  | JOA<br>VAS<br>AE                                                                                               | 4w  | Pre- and post-treatment                                              | pain/function/ADL<br>pain<br>AE                                                                                            | pain function<br>AE            | CA-TCM  |

|                         |       |                                                        |                            |                                                                                            |     |                                                          |                                                                        |                                |           |
|-------------------------|-------|--------------------------------------------------------|----------------------------|--------------------------------------------------------------------------------------------|-----|----------------------------------------------------------|------------------------------------------------------------------------|--------------------------------|-----------|
| Dou Qunli, 2007[61]     | 83/83 | CM herb+Manual therapy                                 | Canal injection + Traction | Responder rates                                                                            | 2m  | Pre- and post-treatment                                  | pain/function/                                                         | pain function                  | DEC - TCM |
| Chen Shulie, 2006[62]   | 32/7  | Manual therapy+Topical CM                              | Drugs                      | Responder rates                                                                            | 4w  | Pre- and post-treatment                                  | pain/function/                                                         | pain function                  | NR        |
| Wang Fuyu, 2018[63]     | 48/48 | CM herb+Acupuncture                                    | Usual care                 | JOA<br>VAS<br>IL-1<br>TNF                                                                  | 4w  | Pre-treatment, 2 and 4w after treatment                  | pain/function/<br>ADL<br>pain<br>Inflammatory markers                  | pain function<br>Physiological | JOA       |
| Xiong Junwei, 2015[64]  | 30/30 | Acupotomy+Manual therapy                               | Acupotomy                  | JOA<br>Responder rates<br>AE                                                               | 3w  | Pre-treatment, 1, 2 and 3w after treatment, follow-up 2w | pain/function/<br>ADL<br>pain/function/<br>ADL<br>AE                   | pain function<br>AE            | JOA       |
| Chen Jianhong, 2004[65] | 60/60 | Acupotomy+CM herb                                      | Drugs + Traction           | Global Rating of Change Scale<br>SPWT<br>Rang of Lumbar spine extension<br>Responder rates | 14d | Pre- and post-treatment                                  | Global rating of change<br>Measure of walking<br>ROM<br>pain/function/ | pain function                  | DEC - TCM |
| Wang Wenli, 2018[66]    | 30/30 | Electropuncture+fire d<br>cupping+Bloodletting therapy | Physical therapy           | SSS<br>Responder rates<br>Satisfaction                                                     | 8w  | Pre-treatment, 4 and 8w after treatment, follow-up 4w    | pain/function/<br>pain/function/<br>satisfaction<br>AE                 | pain function<br>satisfactio   | DEC - TCM |

|                                     |             |                                                               |                  |                              | subdomain of SSS<br>AE |     | for Patient<br>satisfaction<br>index                                 | n<br>AE                                              |                                       |                 |
|-------------------------------------|-------------|---------------------------------------------------------------|------------------|------------------------------|------------------------|-----|----------------------------------------------------------------------|------------------------------------------------------|---------------------------------------|-----------------|
| Zhong<br>Hongzhen<br>g,<br>2016[67] | 100/10<br>0 | Acupuncture+Moxib<br>ustion                                   | Diclofenac       | ODI                          |                        | 30d | Pre-treatment,<br>10d and 25d<br>after<br>treatment,<br>follow-up 3m | function                                             | function                              | NR              |
| Jing Lei,<br>2019[68]               | 29/30       | Electropuncture+fire<br>d<br>cupping+Bloodlettin<br>g therapy | Physical therapy | SSS<br>Responder rates       |                        | 8w  | Pre-treatment,<br>4 and 8w after<br>treatment                        | pain/function/s<br>atisfaction<br>pain/function/     | pain<br>function<br>satisfactio<br>n  | DEC<br>-<br>TCM |
| Wang<br>Hongmei,<br>2019[69]        | 40/40       | Acupuncture+Moxib<br>ustion                                   | GIucos           | JOA<br>IL-6/TNF/CRP          |                        | 10d | Pre- and post-<br>treatment                                          | pain/function/<br>ADL<br>Inflammatory<br>markers     | pain<br>function<br>Physiologi<br>cal | NR              |
| Wang<br>Jian,<br>2013[70]           | 72/72       | Acupuncture+cuppin<br>g                                       | GIucos           | JOA<br>Responder rates<br>AE |                        | 36d | Pre- and post-<br>treatment,<br>follow-up 1m                         | pain/function/<br>ADL<br>pain/function/<br>ADL<br>AE | pain<br>function<br>AE                | JOA             |
| Zhang<br>Hong,<br>2014[71]          | 37/36       | Acupuncture+acupoi<br>nt injection                            | Acupuncture      | JOA<br>Responder rates       |                        | 12d | Pre- and post-<br>treatment                                          | pain/function/<br>ADL<br>pain/function/<br>ADL       | pain<br>function                      | JOA             |

|                        |       |                                  |                                                   |                                                                                  |     |                                       |                                                   |                                |           |
|------------------------|-------|----------------------------------|---------------------------------------------------|----------------------------------------------------------------------------------|-----|---------------------------------------|---------------------------------------------------|--------------------------------|-----------|
| Lin Jincai, 2016[72]   | 35/35 | Acupuncture+CM herb injection    | Acupuncture                                       | Rang of Lumbar spine extension<br>VAS<br>JOA<br>Pain-free walking distance<br>AE | 2w  | Pre- and post-treatment               | ROM<br>pain function<br>measure of walking<br>AE  | pain function<br>AE            | NR        |
| Lv Xiaohua, 2014[73]   | 40/40 | Acupuncture+Bloodletting therapy | Dexamethasone+mannitol+CM herb injection          | Responder rates                                                                  | 10d | Pre- and post-treatment               | pain/function/                                    | pain function                  | NR        |
| Shi Jianwei, 2013[74]  | 37/37 | Acupuncture+manual therapy       | Dexamethasone+mannitol+Salvia (Danshen) injection | Responder rates                                                                  | 23d | Pre- and post-treatment               | pain/function/                                    | pain function                  | DEC - TCM |
| Xu Yunyu, 2014[75]     | 35/35 | Acupuncture+Moxibustion          | Acupuncture                                       | JOA<br>Responder rates                                                           | 25d | Pre- and post-treatment, follow-up 1m | pain/function/ADL<br>pain/function/ADL            | pain function                  | JOA       |
| Zhang Huajun, 2016[76] | 40/40 | Acupuncture+CM herb+moxibustion  | Acupuncture+CM herb                               | VAS<br>JOA<br>CRP<br>ESR                                                         | 14d | Pre- and post-treatment, follow-up 1m | pain<br>pain/function/ADL<br>Inflammatory markers | pain function<br>Physiological | JOA       |
| Ji Yuejun, 2010[77]    | 64/62 | CM herb+Manual therapy           | Acupuncture                                       | self-made lumbar fuction evaluation scale<br>Responder rates                     | 10d | Pre- and post-treatment               | function<br>pain/function/                        | pain function                  | DEC - TCM |

|                           |       |                                      |                           |                                                  |    |                         |                                     |                     |              |
|---------------------------|-------|--------------------------------------|---------------------------|--------------------------------------------------|----|-------------------------|-------------------------------------|---------------------|--------------|
| Ouyang Song, 2014[78]     | 34/34 | Electropuncture+manual therapy       | Traction+Physical therapy | Responder rates                                  | NR | Pre- and post-treatment | pain/function/                      | pain function       | NR           |
| Lian Chongguang, 2009[79] | 40/40 | CM herb+Manual therapy+CM fumigation | Drugs+Traction+TDP        | Responder rates<br>Global Rating of Change Scale | 3w | Pre- and post-treatment | pain/function/symptoms              | pain function       | DEC - TCM    |
| Xiong Yumo, 2017[80]      | 30/30 | CM herb+CM fumigation+Acupotomy      | Drugs+Traction+TDP        | Responder rates<br>Global Rating of Change Scale | 3w | Pre- and post-treatment | pain/function/symptoms              | pain function       | DEC - TCM    |
| Wei Shengqing, 2019[81]   | 42/42 | Acupotomy+Manual therapy             | Manual therapy            | VAS<br>JOA<br>ODI<br>AE                          | 3w | Pre- and post-treatment | pain/function/ADL<br>function<br>AE | pain function<br>AE | VAS ;<br>JOA |
| Miao Zezheng, 2017[82]    | 56/56 | Manual therapy+Topical CM+CM herb    | Usual care                | VAS<br>JOA                                       | NR | Pre- and post-treatment | pain<br>pain/function/ADL           | pain function       | NR           |
| Yang Guang, 2010[83]      | 45/45 | Manual therapy+Topical CM+CM herb    | Usual care                | VAS<br>JOA                                       | 1m | Pre- and post-treatment | pain<br>pain/function/ADL           | pain function       | NR           |
| Xie Weixiong, 2017[84]    | 40/40 | Manual therapy+Topical CM+CM herb    | Usual care                | JOA<br>Responder rates                           | 2w | Pre- and post-treatment | pain/function/ADL<br>pain/function/ | pain function       | NR           |

|                           |       |                        |                                                   |                                                                                |    |                         |                                                                                                            |                                |           |
|---------------------------|-------|------------------------|---------------------------------------------------|--------------------------------------------------------------------------------|----|-------------------------|------------------------------------------------------------------------------------------------------------|--------------------------------|-----------|
| Yin Xiaoxia, 2020[85]     | 51/51 | CM herb+Manual therapy | Manual therapy                                    | Responder rates<br>JOA<br>VAS<br>ODI<br>Pain-free walking distance<br>IL-6/TNF | 4w | Pre- and post-treatment | pain/function/<br>ADL<br>pain/function/<br>ADL<br>pain function measure of walking<br>Inflammatory markers | pain function<br>Physiological | JOA       |
| Zhang Shengquan, 2018[86] | 46/46 | CM herb+Manual therapy | Celecoxib+Mecobalamin+Electrical Nerve Stimulmion | Responder rates                                                                | 4w | Pre- and post-treatment | pain/function/                                                                                             | pain function                  | DEC - TCM |

Notes: CM, Chinese medicine; SPWT, Self-Paced Walk Test; JOA, Japanese Orthopedic Association Score; mJOA, modified Japanese Orthopedic Association Score; VAS, visual analogue scale; NRS, numerical rating scale; AE, adverse events; SF-36, 6-Item Short Form Survey; ADL, activities of daily living; ROM, Range of Movement; RMDQ, Roland Morris Disability Questionnaire; mRMDQ, modified Roland Morris Disability Questionnaire; HADS, Hospital Anxiety and Depression Scale; ODI, Oswestry Disability Index; QOL, Quality of Life; SSS, Spinal Stenosis Scale; ZCQ, Zurich Claudication Questionnaire; TNF, Tumor Necrosis Factor; RBC, Red blood cell; CRP, C-reactive protein; DECTCM, Diagnosis and evaluation Criteria of TCM Diseases and Syndromes; GPCR-ND, Guiding Principles for Clinical Research of New Drugs; CA-TCM, Lumbar spinal stenosis, China Association of Traditional Chinese Medicine, 2013; STI-ICWM, Clinical Research on the Treatment of Soft tissue Injury by Integrated Chinese and Western Medicine; COCE, Criteria for Orthopedic clinical evaluation; nr, no reported.



Table S6. Characteristics of patients in interviews and Delphi rounds

| patients | gender  | age<br>(years) | disease course<br>(years) | Complicating lumbar<br>spondylolisthesis | Radiographic<br>classification | experience<br>of CM<br>treatment | territorial region | consensus<br>meeting |
|----------|---------|----------------|---------------------------|------------------------------------------|--------------------------------|----------------------------------|--------------------|----------------------|
| A1       | Female  | 73             | 10                        | n                                        | lateral recess                 | y                                | Beijing            | n                    |
| A2       | Female  | 66             | 3                         | n                                        | central spinal canal           | y                                | Hebei              | y                    |
| A3       | Male    | 69             | 2                         | y                                        | intervertebral foramen         | y                                | Beijing            | n                    |
| A4       | Female  | 71             | 9                         | n                                        | central spinal canal           | y                                | Beijing            | n                    |
| A5       | Male    | 58             | 8                         | y                                        | central spinal canal           | n                                | Beijing            | n                    |
| A6       | Male*   | 73             | 11                        | n                                        | lateral recess                 | y                                | Shandong           | n                    |
| A7       | Female* | 64             | 7                         | y                                        | lateral recess                 | y                                | Guangdong          | y                    |
| A8       | Female* | 63             | 3                         | n                                        | intervertebral foramen         | n                                | Changchun          | y                    |
| A9       | Male*   | 68             | 6                         | y                                        | central spinal canal           | y                                | Changchun          | n                    |
| A10      | Female  | 55             | 7                         | y                                        | lateral recess                 | y                                | Beijing            | y                    |
| A11      | Female  | 75             | 13                        | n                                        | lateral recess                 | y                                | Shandong           | n                    |
| A12      | Male    | 83             | 10                        | n                                        | central spinal canal           | y                                | Beijing            | n                    |
| A13      | Female* | 55             | 1                         | y                                        | intervertebral foramen         | n                                | Liaoning           | y                    |
| A14      | Male*   | 54             | 2                         | y                                        | central spinal canal           | y                                | Liaoning           | y                    |
| A15      | Female* | 69             | 1                         | n                                        | central spinal canal           | y                                | Beijing            | y                    |
| A16      | Female* | 64             | 20                        | y                                        | lateral recess                 | y                                | Shanghai           | y                    |
| A17      | Female  | 72             | 30                        | n                                        | intervertebral foramen         | y                                | Beijing            | n                    |
| A18      | Male    | 60             | 4                         | y                                        | lateral recess                 | y                                | Beijing            | y                    |

Note: \* presents the patients interview conducted via WeChat software; CM, Chinese medicine; y, yes; n, no;

Table S7. Characteristics of experts in Delphi rounds

| experts | gender | age<br>(years) | work<br>experience<br>(years) | title        | medical major           | academic<br>researcher | territorial<br>region | consensus<br>meeting |
|---------|--------|----------------|-------------------------------|--------------|-------------------------|------------------------|-----------------------|----------------------|
| Ex 1    | male   | 49             | 24                            | senior       | Tuina                   | Y                      | Beijing               | Y                    |
| Ex 2    | male   | 54             | 31                            | senior       | Tuina                   | Y                      | Beijing               | N                    |
| Ex 3    | male   | 56             | 33                            | senior       | Tuina                   | Y                      | Beijing               | Y                    |
| Ex 4    | male   | 60             | 38                            | senior       | Tuina                   | Y                      | Beijing               | Y                    |
| Ex 5    | male   | 39             | 11                            | intermediate | orthopaedics            | Y                      | Beijing               | N                    |
| Ex 6    | male   | 50             | 28                            | intermediate | orthopaedics            | Y                      | Beijing               | N                    |
| Ex 7    | male   | 32             | 7                             | intermediate | orthopaedics            | Y                      | Guizhou               | Y                    |
| Ex 8    | male   | 48             | 24                            | senior       | acupuncture             | Y                      | Beijing               | Y                    |
| Ex 9    | female | 41             | 11                            | intermediate | acupuncture             | Y                      | Beijing               | Y                    |
| Ex 10   | male   | 37             | 8                             | intermediate | acupuncture             | Y                      | Beijing               | N                    |
| Ex 11   | male   | 43             | 20                            | senior       | acupuncture             | Y                      | Beijing               | N                    |
| Ex 12   | male   | 56             | 31                            | senior       | pain management         | Y                      | Shandong              | Y                    |
| Ex 13   | male   | 36             | 8                             | intermediate | rehabilitation          | Y                      | Beijing               | Y                    |
| Ex 14   | female | 57             | 35                            | senior       | general family medicine | N                      | Beijing               | Y                    |
| Ex 15   | female | 56             | 32                            | intermediate | pain management         | N                      | Beijing               | Y                    |
| Ex 16   | female | 37             | 15                            | intermediate | nursing                 | Y                      | Beijing               | N                    |
| Ex 17   | male   | 48             | 24                            | senior       | orthopaedics            | Y                      | Shanghai              | Y                    |
| Ex 18   | male   | 50             | 26                            | senior       | orthopaedics            | Y                      | Guangdong             | Y                    |
| Ex 19   | male   | 53             | 30                            | senior       | orthopaedics            | Y                      | Xinjiang              | Y                    |
| Ex 20   | male   | 42             | 16                            | intermediate | orthopaedics            | Y                      | Changchun             | Y                    |
| Ex 21   | female | 39             | 11                            | intermediate | rehabilitation          | Y                      | Liaoning              | Y                    |

Note: y, yes; n, no.

Table S8. Candidate outcomes ratings from patients and experts in Delphi 2 rounds and voting at consensus meeting

| Candidate Outcomes |    | Delphi round 1 (n=39) |             |             |                 |             |             | Delphi round 2 (n=39) |             |             |                 |             |             | consensus meeting voting (n=24) |                         |                         |
|--------------------|----|-----------------------|-------------|-------------|-----------------|-------------|-------------|-----------------------|-------------|-------------|-----------------|-------------|-------------|---------------------------------|-------------------------|-------------------------|
|                    |    | experts (n=21)        |             |             | patients (n=18) |             |             | experts (n=21)        |             |             | patients (n=18) |             |             | NGT re-identified outcomes      | experts (n=15)<br>% yes | patients (n=9)<br>% yes |
|                    |    | % score 1-3           | % score 4-6 | % score 7-9 | % score 1-3     | % score 4-6 | % score 7-9 | % score 1-3           | % score 4-6 | % score 7-9 | % score 1-3     | % score 4-6 | % score 7-9 |                                 |                         |                         |
|                    |    |                       |             |             |                 |             |             |                       |             |             |                 |             |             |                                 |                         |                         |
| Pain               |    | 0%                    | 10%         | 90%         | 0%              | 0%          | 100%        | nr                    | nr          | nr          | nr              | nr          | nr          | Pain and discomfort             | 100%                    | 100%                    |
| Function           |    | 5%                    | 5%          | 90%         | 0%              | 6%          | 94%         | nr                    | nr          | nr          | nr              | nr          | nr          | lumbar function                 | 100%                    | 100%                    |
| ADL                |    | 0%                    | 10%         | 90%         | 0%              | 0%          | 100%        | nr                    | nr          | nr          | nr              | nr          | nr          | ADL                             | 93%                     | 89%                     |
| ROM                |    | 10%                   | 33%         | 57%         | 11%             | 11%         | 78%         | 5%                    | 19%         | 76%         | 6%              | 17%         | 78%         | ROM                             | 60%                     | 33%                     |
| Symptoms           |    | 0%                    | 10%         | 90%         | 11%             | 22%         | 67%         | 0%                    | 0%          | 100%        | 11%             | 17%         | 72%         | nr                              | nr                      | nr                      |
| Measure of walking | of | 0%                    | 33%         | 67%         | 11%             | 22%         | 67%         | 0%                    | 5%          | 95%         | 0%              | 11%         | 89%         | Walking function                | 100%                    | 89%                     |

|                         |     |     |            |     |     |            |     |     |            |     |     |            |                           |             |             |
|-------------------------|-----|-----|------------|-----|-----|------------|-----|-----|------------|-----|-----|------------|---------------------------|-------------|-------------|
| Global rating of change | 0%  | 24% | 76%        | 6%  | 28% | 67%        | 0%  | 14% | <b>86%</b> | 6%  | 17% | 78%        | Patient global assessment | <b>93%</b>  | <b>78%</b>  |
| AE                      | 0%  | 24% | 76%        | 0%  | 11% | <b>89%</b> | 0%  | 24% | 76%        | 0%  | 6%  | <b>94%</b> | AE                        | <b>100%</b> | <b>100%</b> |
| Biomarkers              | 29% | 43% | 29%        | 28% | 33% | 39%        | 29% | 52% | 19%        | 11% | 50% | 39%        | Biomarkers                | 0%          | 11%         |
| Radiographic changes    | 5%  | 43% | 52%        | 6%  | 22% | 72%        | 5%  | 33% | 62%        | 0%  | 28% | 72%        | Radiographic changes      | 47%         | 22%         |
| CM specific outcomes    | 10% | 24% | 67%        | 6%  | 33% | 61%        | 0%  | 14% | <b>86%</b> | 6%  | 28% | 67%        | CM specific outcomes      | <b>100%</b> | <b>67%</b>  |
| Mental health           | 5%  | 38% | 57%        | 6%  | 33% | 61%        | 0%  | 43% | 57%        | 0%  | 17% | <b>83%</b> | Mental health             | 53%         | 78%         |
| Satisfaction index      | 0%  | 29% | 71%        | 0%  | 28% | 72%        | 0%  | 24% | 76%        | 0%  | 28% | 72%        | Satisfaction index        | 7%          | 44%         |
| Quality of life         | 5%  | 14% | <b>81%</b> | 0%  | 11% | <b>89%</b> | nr  | nr  | nr         | nr  | nr  | nr         | health related QOL        | <b>100%</b> | <b>78%</b>  |
| Adherence and attrition | 14% | 29% | 57%        | 0%  | 33% | 67%        | 10% | 14% | 76%        | 0%  | 50% | 50%        | Adherence and attrition   | 7%          | 0%          |
| Psychosocial            | 48% | 38% | 14%        | 44% | 39% | 17%        | 19% | 71% | 10%        | 28% | 50% | 22%        | Psychosocial              | 13%         | 33%         |
| Resource use            | 14% | 24% | 62%        | 0%  | 22% | 78%        | 5%  | 24% | 71%        | 6%  | 22% | 72%        | Resource use              | 47%         | 78%         |

Note: CM, Chinese medicine; AE, adverse events; ADL, activities of daily living; ROM, Range of Movement; QOL, quality of life; nr, no reported. The Bold number in this table met the predefined "consensus in" thresholds

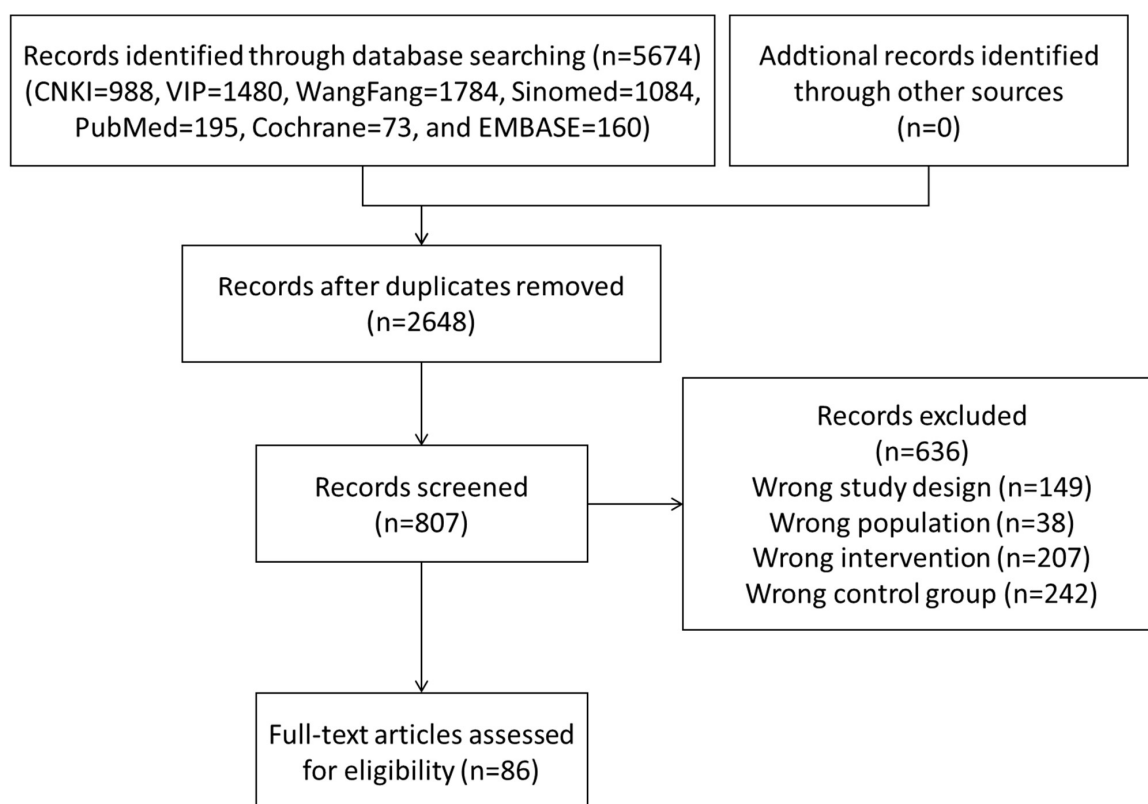

Figure S1. PRISMA flow diagram

### Reference of included studies

- [1] Zeng Haobin, Chen Maoshui, Wu Yongsheng. A randomized controlled study on the clinical effect of chiropractic manipulation and traditional massage manipulation in the treatment of lumbar spinal stenosis [J]. Chinese Medicine Herald, 2020, 17(18): 103-6. (in Chinese)
- [2] Chen Jian. Clinical research on the treatment of lumbar spinal stenosis with nourishing liver and kidney method combined with insect medicine [D]; Guangzhou University of Traditional Chinese Medicine, 2019. (in Chinese)
- [3] Feng Sui, Gou Lingyun, Zheng Hongbo. Clinical observation of acupuncture-knife treatment of lumbar spinal stenosis [J]. Modern Journal of Integrated Traditional Chinese and Western Medicine, 2009, 18(12): 1389-90. (in Chinese)
- [4] Geng Xiaoyan. Discussion on the clinical effect of nourishing qi, nourishing blood and activating collaterals in the treatment of lumbar spinal stenosis [J]. Electronic Journal of Cardiovascular Diseases of Integrated Traditional Chinese and Western Medicine, 2017, 5(12): 98,100. (in Chinese)
- [5] Gu Qi. Observation on the clinical curative effect of Yaobi Granules on degenerative lumbar spinal stenosis and the mechanism of its inhibitory effect on inflammatory factors [D]; Chinese Academy of Chinese Medical Sciences, 2015. (in Chinese)
- [6] Guan Xiaoyong. Clinical Observation of Treatment of Lumbar Spinal Stenosis with Tonifying Qi, Nourishing Blood and Activating Collaterals [J]. New Chinese Medicine, 2015, 47(6): 134-5. (in Chinese)
- [7] Hou Yu, Li Zehui, Liang Yihao, et al. Clinical research on the treatment of degenerative lumbar spinal stenosis with forward bending and rolling at the waist [J]. New Chinese Medicine, 2019, 51(03): 261-4. (in Chinese)
- [8] Huang Zheng, Feng Hui, Zhang Zifeng, et al. Study on the treatment of degenerative lumbar spinal stenosis with traditional Chinese medicine combined with acupuncture [J]. World Traditional Chinese Medicine, 2017, 12(12): 3109-13. (in Chinese)
- [9] Huang Zhifen, Xiu Zhongbiao. Curative Effect Observation of Modified Duhuo Jisheng Decoction in Treating 50 Cases of Degenerative Lumbar Spinal Stenosis [J]. Medical Review, 2009, 15(16): 2542-3. (in Chinese)
- [10] Ji Wei, Chen Jianhua, Sun Bo, et al. Clinical research on the treatment of lumbar spinal stenosis with Shishi Shangke Zhilong Juanbi Tablets [J]. Chinese Journal of Orthopedics and Traumatology, 2013, 21(09): 21 -2+5. (in Chinese)
- [11] Jia Yangchun, Yu Suqin, Shi Deju. Treatment of 45 cases of lumbar spinal stenosis with Gubisan [J]. Shanghai Journal of Traditional Chinese Medicine, 2005, (03): 30-1. (in Chinese)
- [12] Li Jinxue, Zhao Min, Cao Yong. Observation on curative effect of optimized combination of Chinese and Western medicines in the treatment of degenerative lumbar spinal stenosis [J]. Chinese Journal of Orthopedics and Traumatology, 2007, (12): 21-4. (in Chinese)
- [13] Li Jinxue, Zhu Liguang, Luo Jie, et al. Observation on the curative effect of Yaobi Granules in the treatment of degenerative lumbar spinal stenosis [J]. World Traditional Chinese Medicine, 2013, (11): 1305-8. (in Chinese)
- [14] Li Qiming, Zhang Junqi, Shi Suying, et al. Observation on the effect of Buyang Huanwu

- Decoction in the treatment of degenerative lumbar spinal stenosis [J]. *Family Medicine*, 2018, (5): 39. (in Chinese)
- [15] Li Rui. Clinical effect of Xingqi Huoxuezhitong formula in treating lumbar spinal stenosis [J]. *Shaanxi Traditional Chinese Medicine*, 2016, 37(9): 1200-2. (in Chinese)
- [16] Li Zhiwei. Clinical and experimental research on the treatment of degenerative lumbar spinal stenosis with cold-damp numbness syndrome with Zhiguanling prescription [D]; Nanjing University of Traditional Chinese Medicine, 2008. (in Chinese)
- [17] Lin Yuanfang, Chen Weimei, Wei Yizong, et al. Observation on the clinical efficacy of point-line bone-setting and tuning method in the treatment of lumbar spinal stenosis [J]. *Massage and Rehabilitation Medicine*, 2017, 8(22): 47-9. (in Chinese)
- [18] Liu Chenhui. Clinical research on the treatment of lumbar spinal stenosis of kidney deficiency and blood stasis type with modified Huangqi Sichong Decoction [D]; Fujian University of Traditional Chinese Medicine, 2019. (in Chinese)
- [19] Liu Haifan, Liu Xiaowei. Clinical research on the treatment of lumbar spinal stenosis with small needle knife [J]. *Chinese Medicine Herald*, 2010, 7(6): 58-9. (in Chinese)
- [20] Liu Jun, Hu Zhigang. Clinical analysis of Yishen Tongbi Decoction in the treatment of lumbar spinal stenosis [J]. *Frontiers of Medicine*, 2020, 10(18): 188.
- [21] Sheng Xinjun, Ni Mengyuan. Observation on the Curative Effect of Small Acupuncture Knife in Treatment of Pain and Dysfunction Caused by Elderly Lumbar Spinal Stenosis [J]. *New Chinese Medicine*, 2016, 48(11): 80-2. (in Chinese)
- [22] Su Lianshu. Clinical research on the treatment of lumbar spinal stenosis with water acupuncture-knife paravertebral release combined with nerve root foramen ligament dissection[Z]. *Proceedings of the 2016 Academic Annual Conference of the Acupuncture Branch of the Chinese Association of Chinese Medicine*. Chengdu. 2016: 223-8 (in Chinese)
- [23] Sun Biyun. Observation on the Curative Effect of Acupuncture Relieving Pain Symptoms and Dysfunction in Patients with Degenerative Lumbar Spinal Stenosis [D]; Chinese Academy of Chinese Medical Sciences, 2021. (in Chinese)
- [24] Tang Hanwu. Pathogenesis and clinical research of "Duo Yang deficiency" in degenerative lumbar spinal stenosis [D]; Guangzhou University of Traditional Chinese Medicine, 2015. (in Chinese)
- [25] Wang Chenghong. Study on the Curative Effect of Acupuncture and Moxibustion on Lumbar Spinal Stenosis [J]. *Chinese Journal of Physical Medicine and Rehabilitation*, 2009, 31(1): 42-3. (in Chinese)
- [26] Wang Guanjin, Lu Wuchao. Clinical study of Yishen Tongbi Decoction in the treatment of lumbar spinal stenosis [J]. *New Chinese Medicine*, 2019, 51(12): 152-4. (in Chinese)
- [27] Wang Haijun, Gao Chunyu, Gu Shuming, et al. Clinical observation of treating degenerative lumbar spinal stenosis with low back pain with Jingjin knife [J]. *Chinese Medical Journal*, 2017, 52(10): 38-42. (in Chinese)
- [28] Wang Hua. Observation on the effect of massage on lower limb pain caused by lumbar spinal stenosis [J]. *World Clinical Medicine*, 2017, 11(8): 160. (in Chinese)
- [29] Wu Shizhen. Observation on the curative effect of lumbar spinal stenosis treated with small needle-knife decompression via lateral recess [Z]. *Proceedings of the Third National Symposium on Clinical Experience of Liver Diseases Treated by Integrated*

- Traditional Chinese and Western Medicine. Beijing. 2016: 246-7 (in Chinese)
- [30] Xiao Zhenhua. Observation on the Curative Effect of Blade Acupuncture on Pain and Dysfunction Caused by Elderly Lumbar Spinal Stenosis [J]. Medical Aesthetics and Cosmetology, 2021, 30(8): 47. (in Chinese)
- [31] Zhou Qishi, Zheng Xiaohui, Huang Feng, et al. Observation on curative effect of single seahorse decoction in treating 51 cases of lumbar spinal stenosis and its effect on serum endothelin content [J]. New Chinese Medicine, 2002, 34(9): 35 -6. (in Chinese)
- [32] KIM K H, KIM D H, KIM Y R, et al. Acupuncture for symptomatic lumbar spinal stenosis: a pilot randomized trial [J]. Integrative medicine research, 2015, 4(1 SUPPL. 1): 27.
- [33] OKA H, MATSUDAIRA K, TAKANO Y, et al. A comparative study of three conservative treatments in patients with lumbar spinal stenosis: lumbar spinal stenosis with acupuncture and physical therapy study (LAP study) [J]. BMC complementary and alternative medicine, 2018, 18(1): 19.
- [34] QIN Z, DING Y, XU C, et al. Acupuncture vs Noninsertive Sham Acupuncture in Aging Patients with Degenerative Lumbar Spinal Stenosis: A Randomized Controlled Trial [J]. Am J Med, 2020, 133(4): 500- 7.e20.
- [35] Xu Jialong. Observation on the clinical efficacy of Bushen Zhuangjin Decoction in the treatment of senile degenerative lumbar spinal stenosis (syndrome of deficiency of kidney qi) [D]; Fujian University of Traditional Chinese Medicine, 2021. (in Chinese)
- [36] Zhu Shuxian. Clinical observation of degenerative lumbar spinal stenosis treated with tuck-knee rolling method [D]; Hunan University of Traditional Chinese Medicine, 2014. (in Chinese)
- [37] Liu Li. Clinical research on "warming acupuncture and moxibustion at Jiaji points" in the treatment of lumbar spinal stenosis of kidney yang deficiency [D]; Shanxi University of Traditional Chinese Medicine, 2020. (in Chinese)
- [38] Wang Chenghu, Lu Shiqi, Song Guihong, et al. Observation on the curative effect of 45 cases of lumbar spinal stenosis treated with Baihui warming acupuncture and moxibustion combined with waist and legs seven acupuncture prescription [J]. Hunan Journal of Traditional Chinese Medicine, 2014, 30(10): 79-80. (in Chinese)
- [39] Su Tao, Deng Haixia. Curative effect observation of 60 cases of lumbar spinal stenosis treated with acupuncture, moxibustion and massage [J]. Innovation in Chinese Medicine, 2011, 8(1): 155-6. (in Chinese)
- [40] Liao Jian. Clinical research on the treatment of lumbar spinal stenosis by tonifying kidney and promoting blood circulation combined with acupuncture and moxibustion [J]. Inner Mongolia Traditional Chinese Medicine, 2017, 36(9): 130-1. (in Chinese)
- [41] Shan Jinchun, Liu Wancheng, Wang Xinwu. Observation on the curative effect of Bushen Zhuanggu Prescription combined with multi-position manipulative reduction in the treatment of lumbar spinal stenosis [J]. Hebei Traditional Chinese Medicine, 2013, 35(8): 1140-1. (in Chinese)
- [42] Hu Kaixia. Clinical efficacy of Buyang Huanwu Decoction combined with traditional Chinese medicine fumigation in the treatment of degenerative lumbar spinal stenosis (qi deficiency and blood stasis type) [D]; Hubei University of Traditional Chinese Medicine, 2021. (in Chinese)
- [43] He Yuanzheng, Feng Zhongkai. Clinical Observation of Modified Buzhong Yiqi Decoction



- Combined with Zhengji Manipulation in Treating Prolapse of Lumbar Intervertebral Disc Complicated with Lumbar Spinal Stenosis [J]. *Traditional Chinese Medicine Zhenggu*, 2009, 21(9): 8-9. (in Chinese)
- [44] Li Zhulie. Clinical research on electrothermal acupuncture treatment of lumbar spinal stenosis [D]; Beijing University of Traditional Chinese Medicine, 2012. (in Chinese)
- [45] Chen Xiaoyun, Zhu Ying, Huang Xiaoshan. Electroacupuncture combined with bloodletting therapy in the treatment of 30 cases of degenerative lumbar spinal stenosis [J]. *Journal of Hainan Medical College*, 2009, 15(9): 1075-7. (in Chinese)
- [46] Lei Xiaoping, Yang Yonghui, Shang Rongan, et al. Clinical efficacy of Duhuo Jisheng Decoction combined with warming acupuncture in treating patients with degenerative lumbar spinal stenosis [J]. *World Traditional Chinese Medicine*, 2020, 15(21): 3313 -7. (in Chinese)
- [47] Cai Lijun, Gao Xujun, Wan Xiaoming, et al. Oral administration of Duhuo Jisheng Decoction combined with external application of traditional Chinese medicine wax therapy in the treatment of 32 cases of lumbar spinal stenosis [J]. *Jiangxi Traditional Chinese Medicine*, 2012, 43(03): 45-7. (in Chinese)
- [48] Yu Weimin, Gu Qingjun. Feng's manipulation combined with Shentong Zhuyu Decoction in the treatment of lumbar spinal stenosis [J]. *Clinical Research of Traditional Chinese Medicine*, 2012, 4(16): 55-6. (in Chinese)
- [49] Zhang Zhirong. Observing the clinical efficacy of combined acupuncture and moxibustion in the treatment of lumbar spinal stenosis [J]. *Inner Mongolia Traditional Chinese Medicine*, 2017, 36(02): 126. (in Chinese)
- [50] Wu Zhijun, Zheng Qingfeng, Lv Weiming. Effect evaluation of spinal massage combined with Duhuo Jisheng Decoction in the treatment of 30 cases of lumbar spinal stenosis [J]. *Basic Medical Forum*, 2018, 22(7): 969-71. (in Chinese)
- [51] Tang Ning. Clinical research on spinal massage combined with Duhuo Jisheng Decoction in the treatment of lumbar spinal stenosis [J]. *Frontiers of Health*, 2016, 25(12): 71,5. (in Chinese)
- [52] Tian Qiang, Zhao Jiayou, Guo Rusong, et al. Clinical research on spinal massage combined with Duhuo Jisheng Decoction in the treatment of lumbar spinal stenosis [J]. *New Chinese Medicine*, 2015, 47(8): 250-1. (in Chinese)
- [53] Ge Caihua, Liu Zhian, Zeng Xianhui, et al. Observation on clinical curative effect of superfine crushing "Xiaobizhitongsan" acupoint hot compress plus sticking in the treatment of senile lumbar spinal stenosis[J]. *Zhonghua General Medicine*, 2016, 14 (3): 384-6. (in Chinese)
- [54] Liang Yihao. Clinical research on the treatment of mild and moderate lumbar spinal stenosis with Lin's forward bending and rolling method [D]; Guangzhou University of Traditional Chinese Medicine, 2016. (in Chinese)
- [55] Liang Bojin. Curative Effect Observation of 25 Cases of Lumbar Spinal Stenosis Treated with Menshi Huoxing Decoction Combined with Manipulation [J]. *New Chinese Medicine*, 2005, 37(4): 35-6. (in Chinese)
- [56] Lin Tingyue. Curative Effect Observation on 48 Cases of Lumbar Spinal Stenosis Treated by Unified Acupuncture and Warming Needle Method [J]. *Hebei Traditional Chinese Medicine*, 2010, 32(03): 404-5. (in Chinese)

- [57] Xu Shiliang, Chen Huizhen. 47 cases of degenerative lumbar spinal stenosis treated with Qiangyao Xuanbi Prescription and hot ironing [J]. Chinese Journal of Experimental Formulas, 2014, 20(17): 190-3. (in Chinese)
- [58] Lu Yaoyu, Li Pu, Hu Kun, et al. The effect of flexion position chiropractic manipulation combined with Miao medicine chicken embryo Dilong paste on microcirculation in patients with lumbar spinal stenosis [J]. Youjiang Medicine, 2014, 42( 1): 1-4. (in Chinese)
- [59] Mao Xiaohui. Observation on the clinical efficacy of triple therapy in the treatment of elderly lumbar spinal stenosis [D]; Hubei University of Traditional Chinese Medicine, 2008. (in Chinese)
- [60] Yuan Zhixian, Fan Dehui, Zhang Zhenning, et al. Clinical observation of Shaogan Wuteng Decoction combined with warming needling moxibustion in the treatment of degenerative lumbar spinal stenosis of cold-dampness obstruction type [J]. Yunnan Journal of Traditional Chinese Medicine, 2020, 41(7): 61 -3. (in Chinese)
- [61] Dou Qunli, Liu Junmin, Yao Fudong. Tongbi Capsule combined with manipulation in the treatment of 83 cases of lumbar spinal stenosis [J]. Journal of Shaanxi University of Traditional Chinese Medicine, 2007, 30(4): 49-50. (in Chinese)
- [62] Chen Shulie. 32 cases of lumbar spinal stenosis treated with external application prescription combined with manipulative reduction [J]. Shaanxi Traditional Chinese Medicine, 2006, (12): 1502-3. (in Chinese)
- [63] Wang Fuyu. Efficacy of Wentong Acupuncture combined with Duhuo Jisheng Decoction in the treatment of degenerative lumbar spinal stenosis and its influence on inflammatory factors [J]. Journal of Acupuncture and Moxibustion Clinic, 2018, 34(9): 24-7. (in Chinese)
- [64] Xiong Junwei. Clinical observation of small needle-knife combined with bone-setting manipulation in the treatment of degenerative lumbar spinal stenosis [D]; Beijing University of Traditional Chinese Medicine, 2015. (in Chinese)
- [65] Chen Jianhong. Clinical research on degenerative lumbar spinal stenosis treated with small needle knife combined with traditional Chinese medicine [J]. Journal of Henan University of Traditional Chinese Medicine, 2004, 19(2): 40-1. (in Chinese)
- [66] Wang Wenli, Zhang Wei, Jing Lei, et al. Effect of needling cupping combined with electroacupuncture on walking ability of degenerative lumbar spinal stenosis [J]. World Journal of Integrated Traditional Chinese and Western Medicine, 2018, 13(02): 207-9 +16. (in Chinese)
- [67] Zhong Hongzheng, Song Feng, Hou Yuru, et al. Observation on the curative effect of penetrating needling along the meridians combined with heat-sensitive moxibustion in the treatment of lumbar spinal stenosis [J]. Guangming Traditional Chinese Medicine, 2016, 31(24): 3636-8. (in Chinese)
- [68] Jing Lei, Zhang Wei, Wang Wenli, et al. Clinical randomized controlled study of Yang's needling and cupping combined with electroacupuncture in the treatment of degenerative lumbar spinal stenosis of wind-cold obstruction type [J]. Shanghai Journal of Traditional Chinese Medicine, 2019, 53 (4): 54-6,70. (in Chinese)
- [69] Wang Hongmei, Zhang E. Effect of Lumbar Three Needles Combined with Warming Needle Moxibustion in Treating Patients with Degenerative Lumbar Spinal Stenosis [J]. Medical Equipment, 2019, 32(6): 102-3. (in Chinese)
- [70] Wang Jian, Qian Zhenfu, Chen Guang, et al. Clinical research on acupuncture plus

- cupping in the treatment of lumbar spinal stenosis [J]. Chinese Medicine Herald, 2013, 10(8): 114-6. (in Chinese)
- [71] Zhang Hong, Yin Ying, Gao Shan, et al. Clinical research on acupuncture combined with Jiaji acupoint injection on lumbar spinal stenosis [J]. Journal of Traditional Chinese Medicine, 2014, 23(2): 5-6. (in Chinese)
- [72] Lin Jincai. Observation on clinical curative effect of acupuncture combined with paravertebral injection of Danqi Mixture in the treatment of lumbar spinal stenosis [D]; Fujian University of Traditional Chinese Medicine, 2016. (in Chinese)
- [73] Lv Xiaohua. Acupuncture combined with blood pricking therapy in the treatment of 80 cases of lumbar spinal stenosis [J]. Clinical Research of Traditional Chinese Medicine, 2014, (14): 50. (in Chinese)
- [74] Shi Jianwei. Acupuncture and massage treatment of 37 cases of lumbar spinal stenosis [J]. Chinese Modern Distance Education of Traditional Chinese Medicine, 2013, 11(3): 65-6. (in Chinese)
- [75] Xu Yunyu. Clinical observation of combined acupuncture and moxibustion in treating lumbar spinal stenosis [J]. Zhejiang Journal of Traditional Chinese Medicine, 2014, 49(05): 362-3. (in Chinese)
- [76] Zhang Huajun, Xu Haidong, He Dengfeng. Observation on the Curative Effect of Acupuncture, Medicine and Moxibustion in Treating Mild to Moderate Degenerative Lumbar Spinal Stenosis [J]. Modern Journal of Integrated Traditional Chinese and Western Medicine, 2016, 25(1): 31-3. (in Chinese)
- [77] Ji Yuejun, Wang Lei. Treatment of 64 cases of lumbar spinal stenosis with traditional Chinese medicine combined with acupuncture [J]. Guangming Traditional Chinese Medicine, 2010, 25(11): 2058-60. (in Chinese)
- [78] Ouyang Song, Luo Jianping, Liao Wentao, et al. Clinical randomized controlled study of traditional Chinese medicine in the treatment of lumbar spinal stenosis [Z]. The 21st National Symposium on Integrative Traditional Chinese and Western Medicine Orthopedics and Orthopedics Branch Compilation of Papers for the General Assembly. Tianjin, China. 2014 (in Chinese)
- [79] Lian Chongguang. Clinical observation on the treatment of lumbar spinal stenosis with traditional Chinese medicine triple therapy [D]; Hubei University of Traditional Chinese Medicine, 2009. (in Chinese)
- [80] Xiong Yumo. Clinical observation of triple therapy of traditional Chinese medicine in the treatment of lumbar spinal stenosis of liver and kidney deficiency [D]; Hubei University of Traditional Chinese Medicine, 2017. (in Chinese)
- [81] Wei Shengqing. Study on the curative effect of traditional Chinese medicine manipulation combined with small needle-knife on pain symptoms and dysfunction in patients with degenerative lumbar spinal stenosis [D]; Hubei University of Traditional Chinese Medicine, 2019. (in Chinese)
- [82] Miao Zezheng. Clinical research on the treatment of degenerative lumbar spinal stenosis with comprehensive therapy of traditional Chinese medicine [J]. Electronic Journal of Clinical Medicine Literature, 2017, 4(57): 11263-4. (in Chinese)
- [83] Yang Guang, Gu Enpeng, Li Zhuo, et al. Clinical research on the treatment of degenerative lumbar spinal stenosis with traditional Chinese medicine comprehensive

- therapy [J]. *Journal of Tianjin University of Traditional Chinese Medicine*, 2010, 29(2): 69-71. (in Chinese)
- [84] Xie Weixiong. Clinical efficacy of comprehensive traditional Chinese medicine therapy in the treatment of lumbar spinal stenosis [J]. *Inner Mongolia Traditional Chinese Medicine*, 2017, 36(17): 18-9. (in Chinese)
- [85] Yin Xiaoxia, Yang Haixia, Wang Yang. Observation on curative effect of modified Buyang Huanwu Decoction combined with manipulation in the treatment of lumbar spinal stenosis [J]. *Chinese Community Physician*, 2020, 36(36): 98-9. (in Chinese)
- [86] Zhang Shengquan. 46 cases of lumbar spinal stenosis of cold-dampness obstruction type treated by traditional Chinese medicine combined with manipulation [J]. *Zhejiang Journal of Traditional Chinese Medicine*, 2018, 53(5): 350. (in Chinese)
